# Supplementary material
Source: Frontiers journal article supplement (https://www.frontiersin.org/articles/554326)
Supplement: Data_Sheet_2.pdf [file Data_Sheet_2.pdf]

## Supplementary Material

- The prior and marginal posterior distributions of the death rate  $\gamma$  are depicted in Fig. S1.
- The pairwise posterior distributions of the parameters  $(\alpha, I_0)$ ,  $(\alpha, \gamma)$ ,  $(\alpha, \kappa)$ ,  $(\gamma, I_0)$ ,  $(\gamma, \kappa)$ ,  $(\kappa, I_0)$  are depicted in Fig. S2.
- To check the sensitivity of our results with respect to the choice of the initial number of susceptible individuals  $S(t_0)$ , we computed the values of  $R_e$  and  $I(t_0)$  associated with the posterior mode, for several choices of  $S(t_0)$ . The results are depicted in Fig. S3.

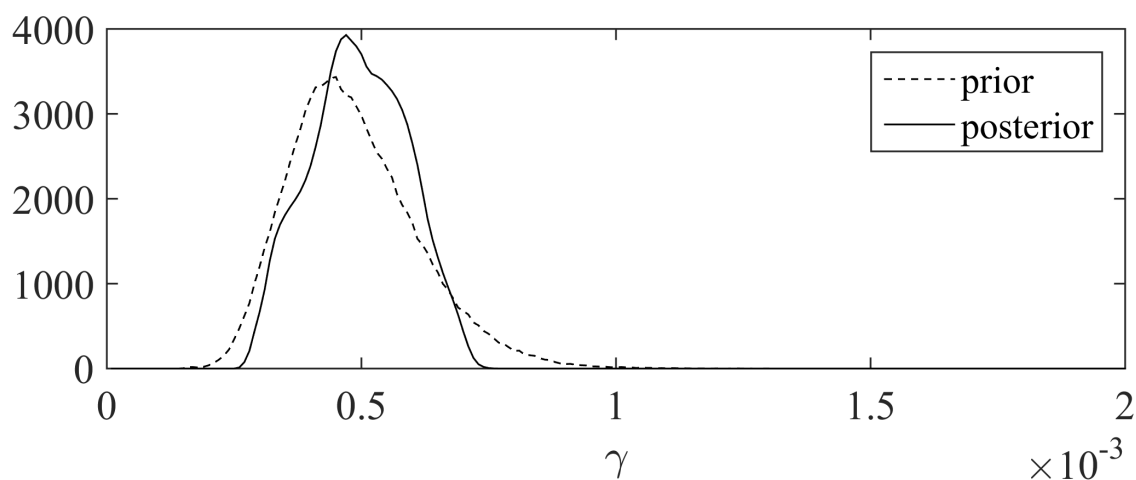

**Figure S1. Prior and marginal posterior distributions of the death rate  $\gamma$ .**

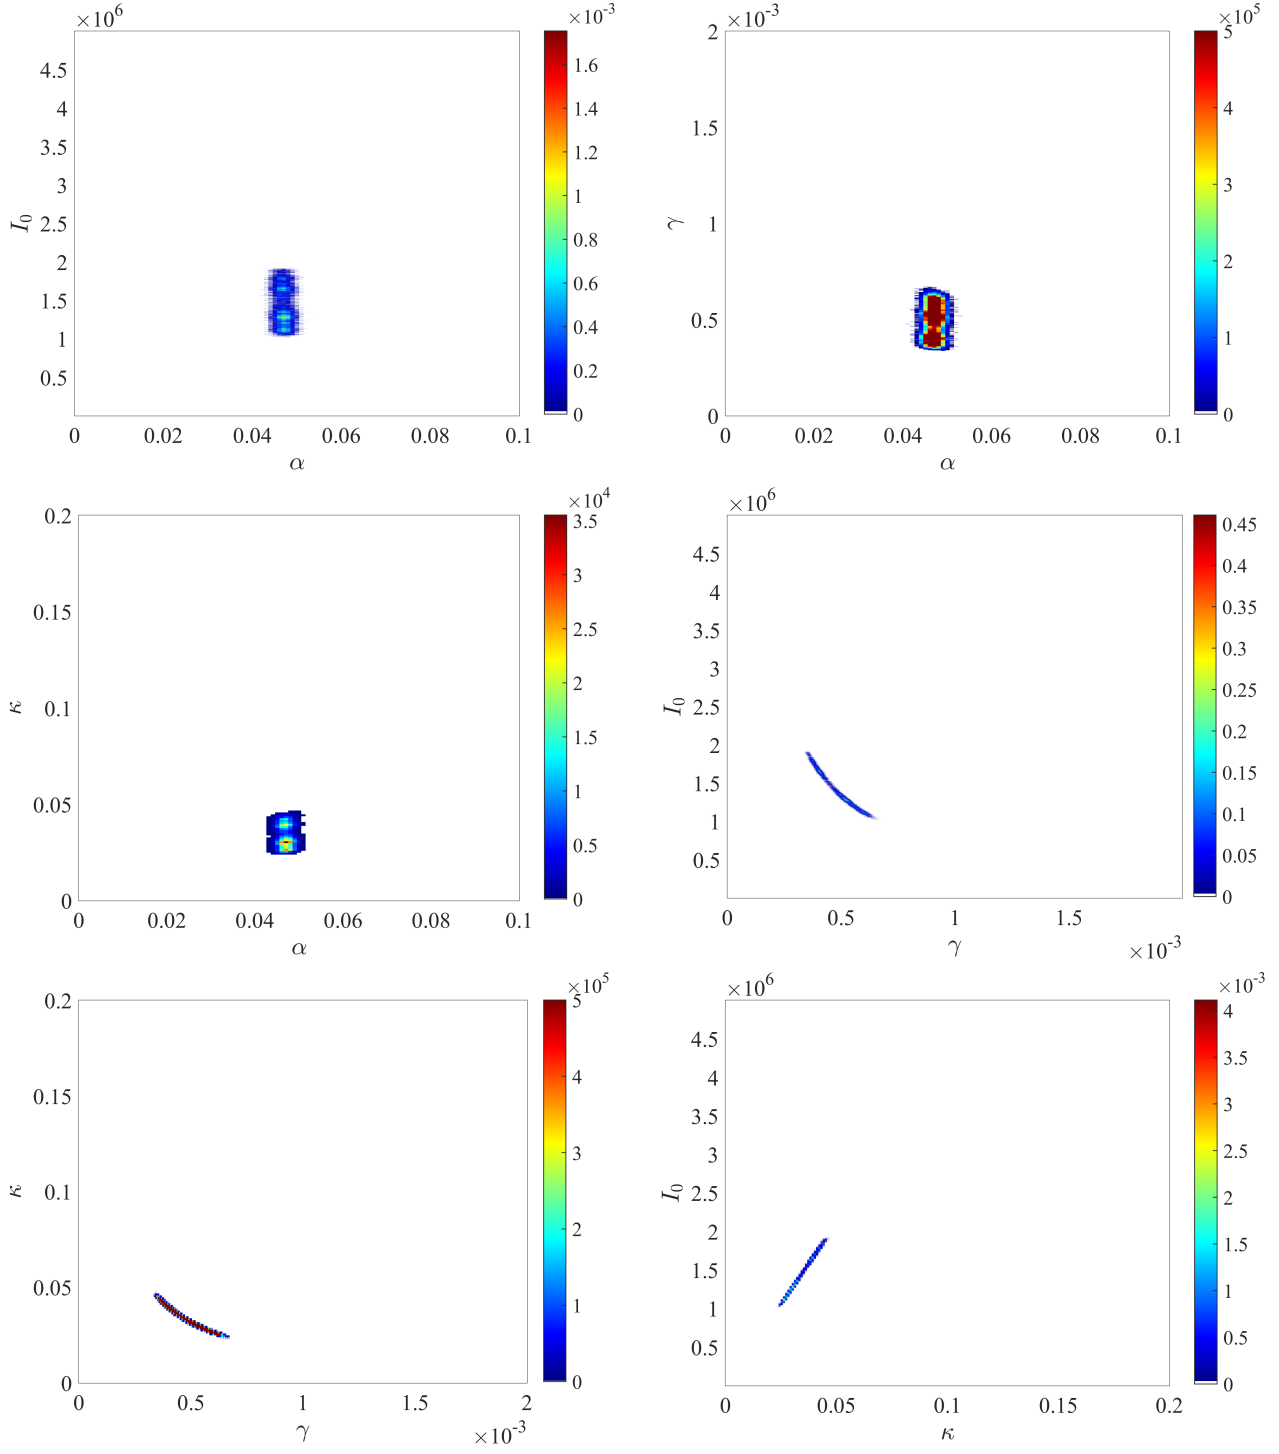

**Figure S2. Joint posterior distributions of  $(\alpha, I_0)$ ,  $(\alpha, \gamma)$ ,  $(\alpha, \kappa)$ ,  $(\gamma, I_0)$ ,  $(\gamma, \kappa)$  and  $(\kappa, I_0)$ .**

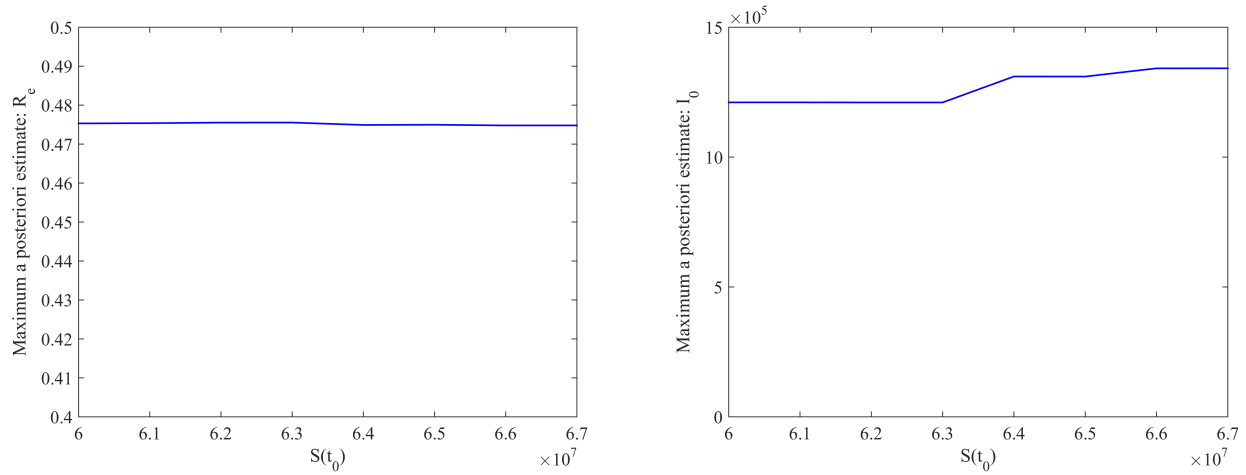

**Figure S3.** Dependence of the maximum posterior estimate of  $R_e$  and  $I_0$  with respect to the initial number of susceptible individuals  $S(t_0)$ .
